# Supplementary material for: Acetic Acid Acts as a Volatile Signal To Stimulate Bacterial Biofilm Formation
Source: PubMed Central journal article supplement — mBio. 2015 Jun 9;6(3):e00392-15. doi: 10.1128/mBio.00392-15 (PMC4462622; doi:10.1128/mbio.00392-15), 2015-06-09
Supplement: mbo003152360sf1.pdf [file mbo003152360sf1.pdf]

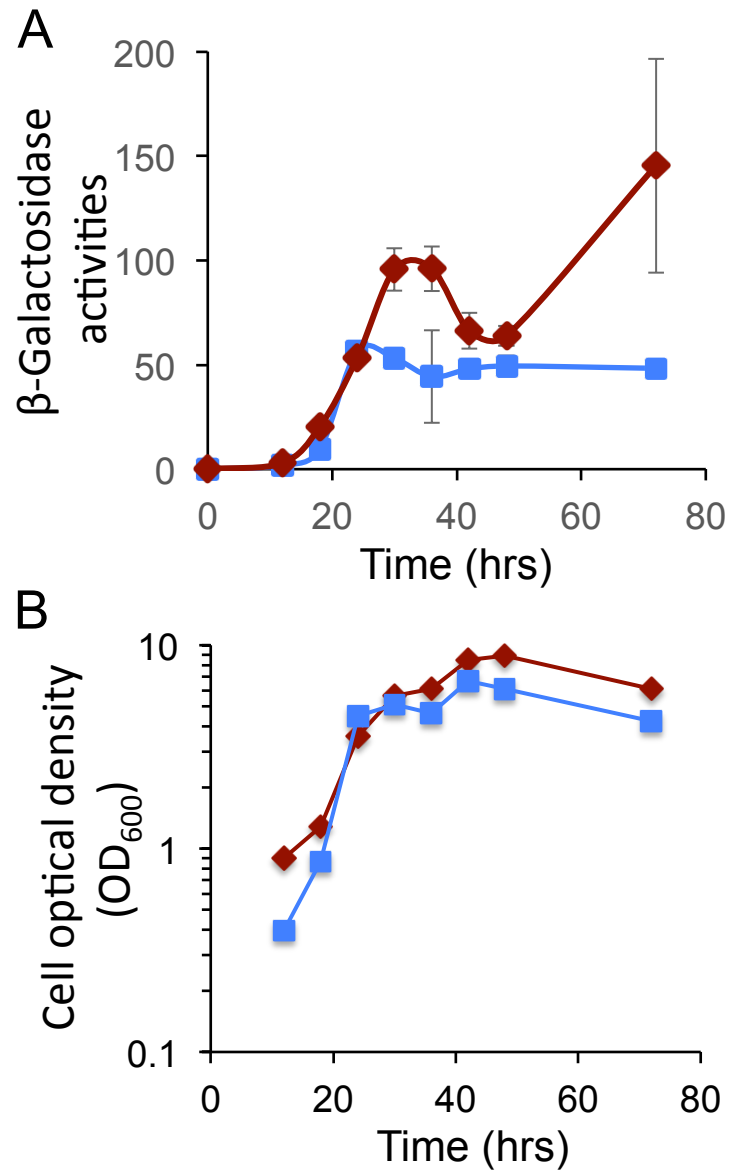

**Figure S1**

**Fig. S1. Volatiles stimulate strong induction of matrix genes and higher biomass of the biofilms. (A).** Comparison of the  $\beta$ -galactosidase activities of *B. subtilis* cells (YC110) containing the  $P_{epaA}$ -*lacZ* reporter in the presence or absence of strong volatiles. Cells were collected from pellicle biofilms at different time points after inoculation (see Supplemental Materials and Methods). Pellicle biofilms were developed at two different conditions, one without and the other with the influence of strong volatiles (similar to Fig. 3C, No. 1 and 2). Results showed that with the influence of strong volatiles (diamond symbols in red), the  $P_{epaA}$ -*lacZ* reporter was expressed at higher levels and earlier than without the strong volatile influence (square symbols in blue). **(B).** Comparison of cell optical density (OD<sub>600</sub>) of the samples collected from pellicle biofilms with (diamond symbols in red) or without (square symbols in blue) the influence of strong volatiles at different time points after inoculation.
