# Supplementary material for: Acetic Acid Acts as a Volatile Signal To Stimulate Bacterial Biofilm Formation
Source: PubMed Central journal article supplement — mBio. 2015 Jun 9;6(3):e00392-15. doi: 10.1128/mBio.00392-15 (PMC4462622; doi:10.1128/mbio.00392-15), 2015-06-09
Supplement: mbo003152360sf2.pdf [file mbo003152360sf2.pdf]

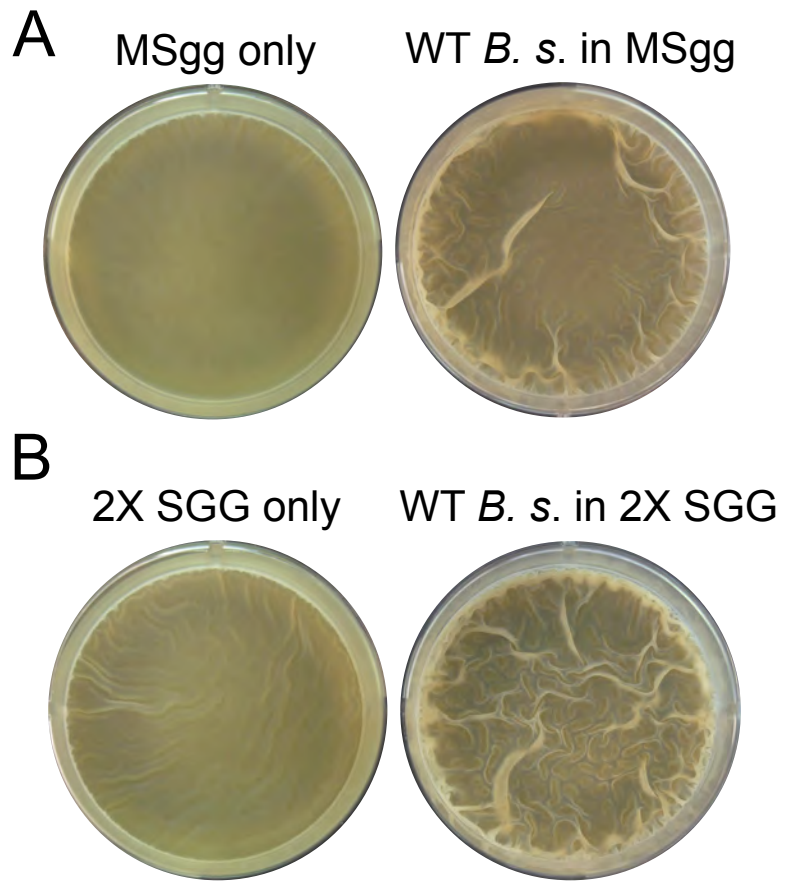

**Figure S2**

**Fig. S2. Bacterial volatiles induce early biofilm formation in *B. subtilis*.**

Similar to the illustration shown in Fig. 3A, in the volatile assay shown here, the well (a) was either filled with MSgg or 2X SGG medium only as a control, or inoculated with wild type *B. subtilis* cells in MSgg or 2X SGG medium as the volatile producers. The well (b) was inoculated with wild type *B. subtilis* cells in LBGM one day later (or two days later in the case of MSgg) as the volatile receiver. All plates were sealed and incubated at 30°C for another 24 hours before pellicle formation in well (b) was recorded. Shown in (A) and (B) is the pellicle formation by cells in the well (b) when either MSgg or 2X SGG medium was used to grow volatile-producing *B. subtilis* cells in the well (a).
