# Supplementary material for: Acetic Acid Acts as a Volatile Signal To Stimulate Bacterial Biofilm Formation
Source: PubMed Central journal article supplement — mBio. 2015 Jun 9;6(3):e00392-15. doi: 10.1128/mBio.00392-15 (PMC4462622; doi:10.1128/mbio.00392-15), 2015-06-09
Supplement: mbo003152360sf3.pdf [file mbo003152360sf3.pdf]

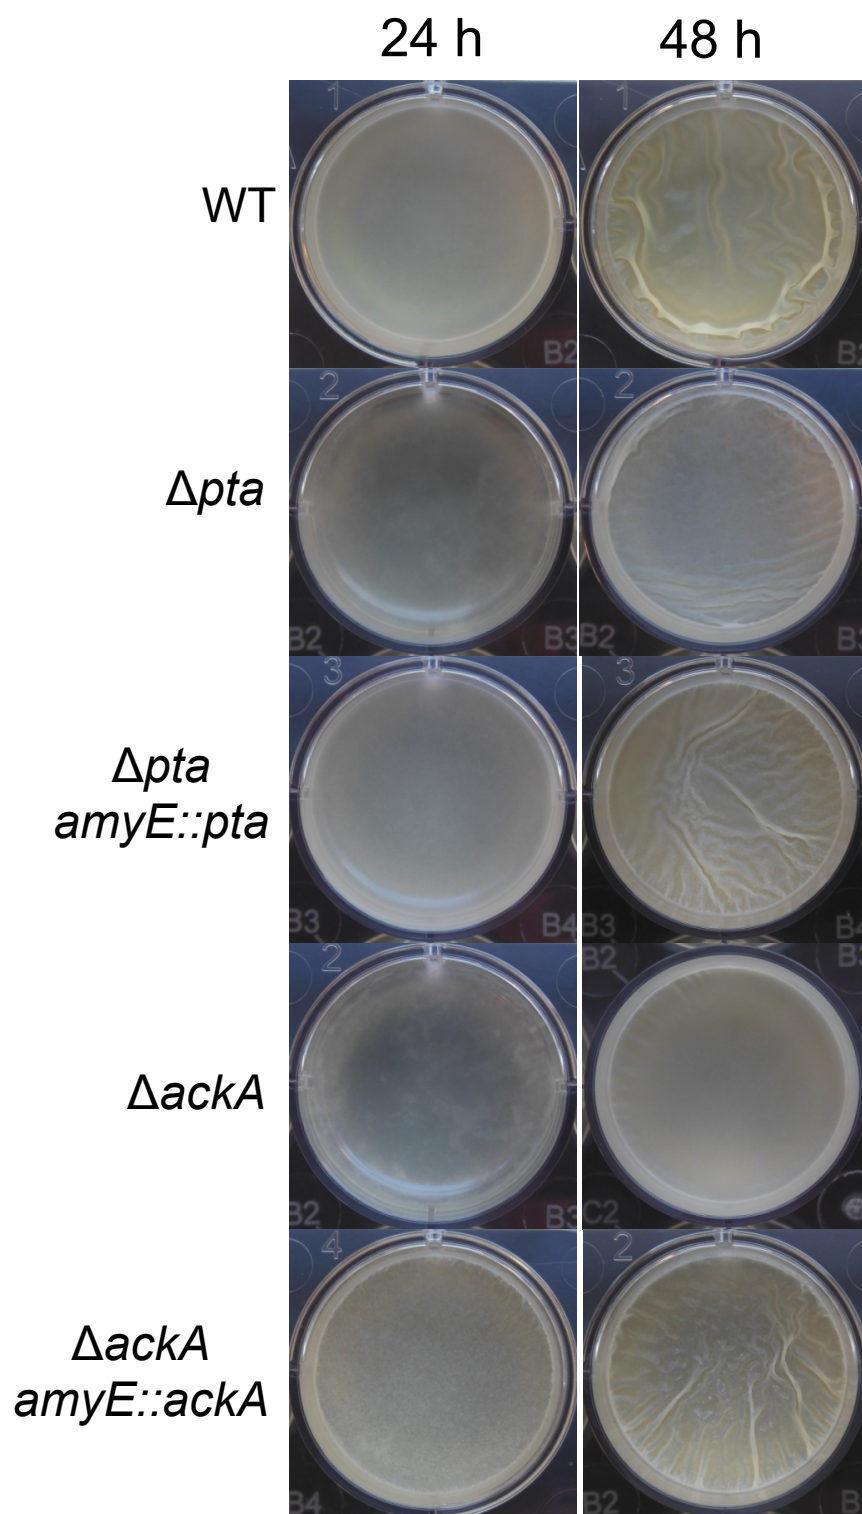

Figure S3

**Fig. S3. Complementation of the delayed biofilm phenotype of the  $\Delta pta$  and  $\Delta ackA$  mutants.** Shown here were pellicle biofilms formed by WT (3610),  $\Delta pta$  (YC1230),  $\Delta pta amyE::pta$  (FY256),  $\Delta ackA$  (YC1220), and  $\Delta pta amyE::ackA$  (FY255) cells. Cells were inoculated in LBGM and incubated statically at 30°C. Images were taken after 24 and 48 hours of incubation.
