# Supplementary material for: Acetic Acid Acts as a Volatile Signal To Stimulate Bacterial Biofilm Formation
Source: PubMed Central journal article supplement — mBio. 2015 Jun 9;6(3):e00392-15. doi: 10.1128/mBio.00392-15 (PMC4462622; doi:10.1128/mbio.00392-15), 2015-06-09
Supplement: mbo003152360sf4.pdf [file mbo003152360sf4.pdf]

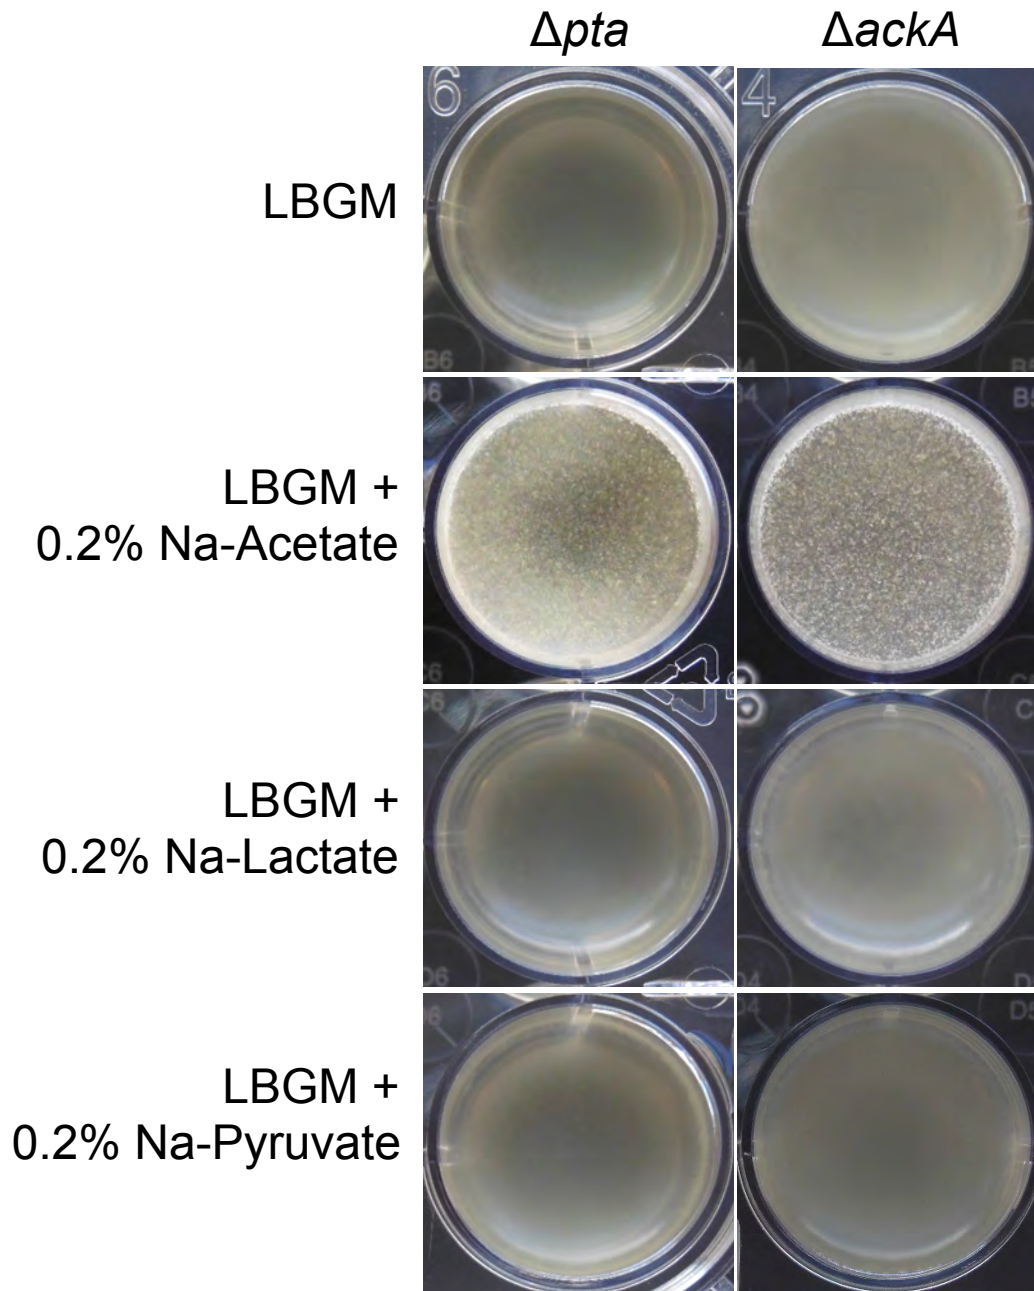

**Figure S4**

**Fig. S4. Addition of acetate, but not lactate or pyruvate, rescued the delayed biofilm phenotype of the  $\Delta pta$  and  $\Delta ackA$  mutants.** The  $\Delta pta$  and  $\Delta ackA$  cells were grown in LBGM without or with supplementation of three different sodium salts, Na-acetate, Na-lactate, and Na-pyruvate. Only Na-acetate rescued the delayed biofilm phenotype of the  $\Delta pta$  and  $\Delta ackA$  mutants. Images were taken after 24 hours of incubation at 30°C.
