# Supplementary material for: Acetic Acid Acts as a Volatile Signal To Stimulate Bacterial Biofilm Formation
Source: PubMed Central journal article supplement — mBio. 2015 Jun 9;6(3):e00392-15. doi: 10.1128/mBio.00392-15 (PMC4462622; doi:10.1128/mbio.00392-15), 2015-06-09
Supplement: mbo003152360sf5.pdf [file mbo003152360sf5.pdf]

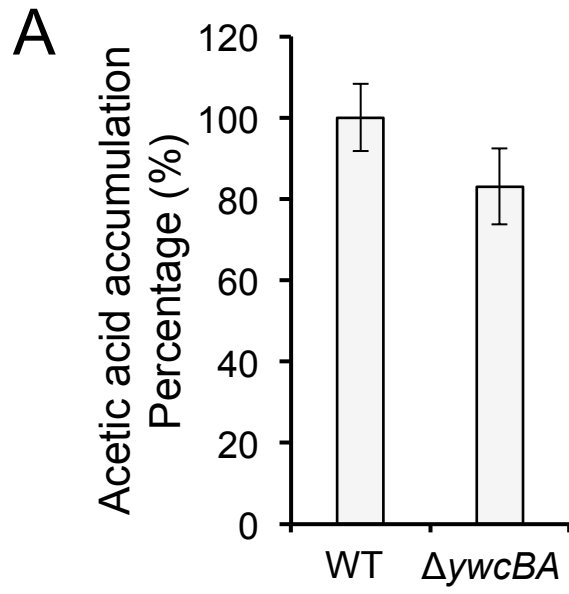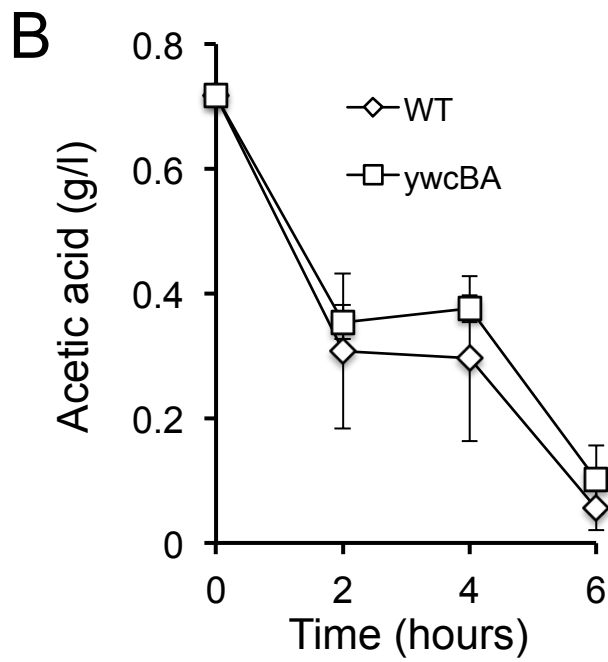

**Figure S5**

**Fig. S5. YwcB-YwcA may function as a putative acetic acid transporter. (A)**

Comparison of acetic acid accumulation in the spent medium when either wild type (3610) or the  $\Delta ywcBA$  mutant (YC535) was grown in LBGM to O.D.<sub>600</sub> =3.

**(B).** Comparison of acetic acid uptake by the wild type or the  $\Delta ywcBA$  mutant grown in a minimal medium with 0.5% (g/v) glutamate as the sole carbon and nitrogen sources (the same as MSgg minus 0.5% glycerol). 0.1% NaAc was added to the media at time zero. Amounts of the remaining acetate in the spent media were measured at hour 2, 4, and 6 after inoculation. Details of acetic acid measurement were provided in the Materials and Methods.
