# Supplementary material for: Acetic Acid Acts as a Volatile Signal To Stimulate Bacterial Biofilm Formation
Source: PubMed Central journal article supplement — mBio. 2015 Jun 9;6(3):e00392-15. doi: 10.1128/mBio.00392-15 (PMC4462622; doi:10.1128/mbio.00392-15), 2015-06-09
Supplement: mbo003152360sf6.pdf [file mbo003152360sf6.pdf]

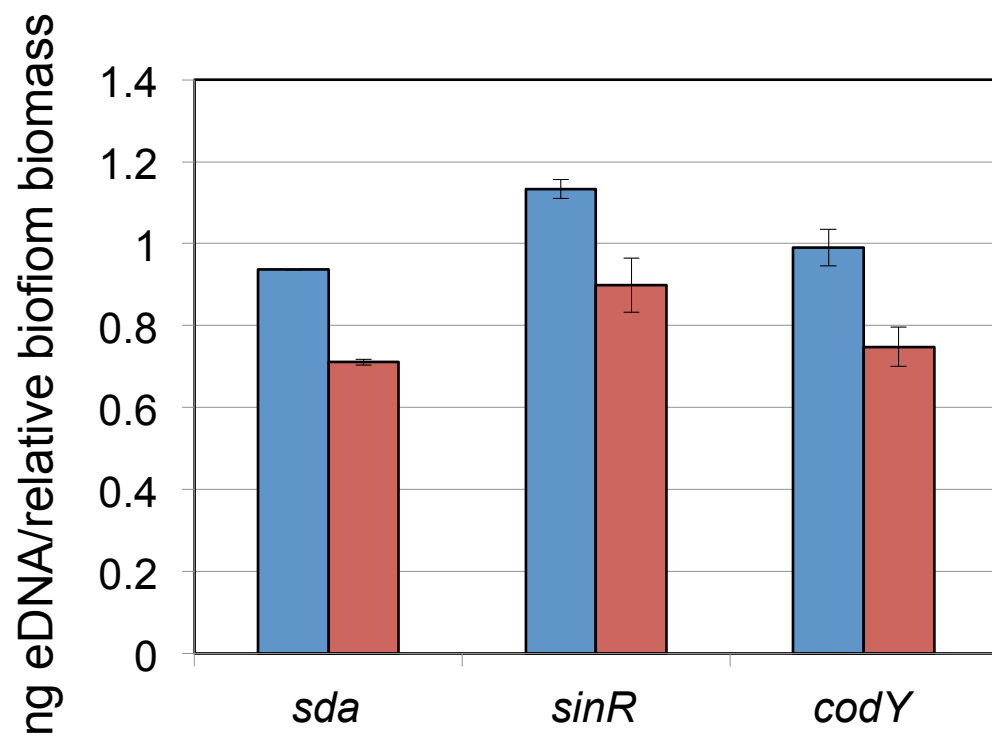

**Figure S6**

**Fig. S6. Quantification by qPCR of eDNA release during pellicle biofilm formation by WT (3610) and the triple mutant of holin-antiholin genes (CY886).** eDNA was prepared from pellicle biofilms formed by 3610 and CY886 (see Supplemental Materials and Methods). Three pairs of primers (see Table S1) corresponding to three chromosomally encoded genes (*sda*, *sinR*, and *codY*) were used in the qPCR test. The y-axis values are expressed as nanogram of eDNA per relative biofilm biomass, Experiments were done in triplicate.
